# Supplementary material for: Genome-wide analysis of AGO, DCL and RDR gene families reveals RNA-directed DNA methylation is involved in fruit abscission in Citrus sinensis
Source: PubMed Central journal article supplement (PMC6739940; doi:10.1186/s12870-019-1998-1), 2019-09-12
Supplement: 12870_2019_1998_MOESM2_ESM.pdf [file 12870_2019_1998_MOESM2_ESM.pdf]

## Gene structural models

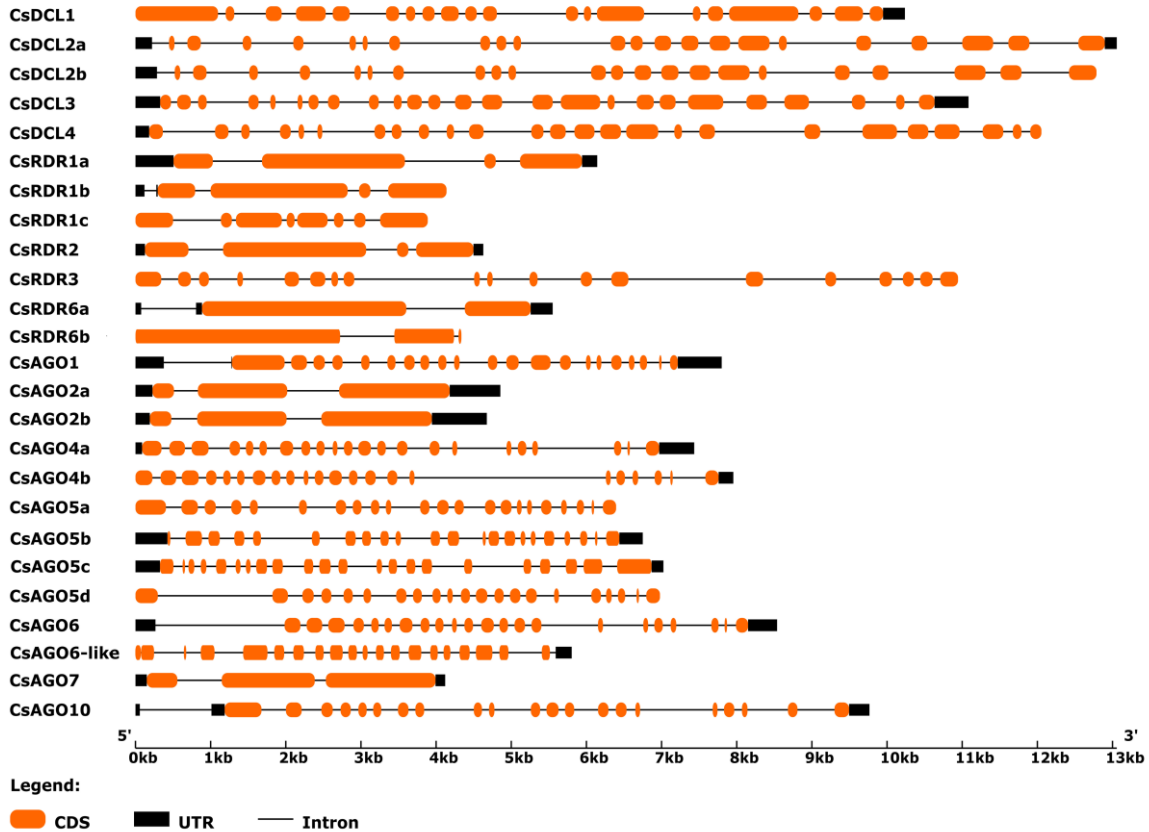

## Updated sequences

CsRDR6b: Cs1g14730 - Chromosome 1: from 18.022.840 to 18.027.238

>CsRDR6b

```
MEPEEREKISVDTQVSVGGFDRDIKAVDLVKYLENEVGGVWRCRLKTSCTPSESYPNFFI
ENVAEVQKTDDYEKVEPHAFVHFATSTYITRAMDAAEHMELFLNGRALKVS LGPENPFRL
NQRGRTSAPLKLDPVYVEIGSLVTQDEFFVSWRGPASGTD FLVDPFDGTCKFCFTKDTAF
ALKSSAEHAVIKCEFKVFLVKEIDIVKQYSELPRVAILLRLASSPRICYRTAEDDIEVLV
PFDLLDDDDPWIRTTDFSPSGAIGRCNSYMLNEVMSYLRKQRVQEDCLSQPVTIREEPDF
EVPMEDPFFFCMHYKEGVSFEIMFLVNAV MHKGILNQHQLSDSFFDLLRCQPREVNV TALK
HIYSYKRPVFDAYEKLKDVQEWLIKPNPKLYEGPKNIDDIAEVRLVITPTKAYCLPPEVE
LSNRVLREMTLLKSEMDEGLQTMNANVLSYYVAPIVKDITSNTFSQKTGVFKRVKSI LSD
GFNL CGRRYSFLAFSSNQLRDHSAWFFSKVGETSVLDIKNWMGEFTAKNIAKYAARMGLC
FSSTHATVEIPPTEVDHELDPDIKRNGYVFS DGIGKITPDLAMEVAQILKLDGSPPPSAYQ
IRYAGYKGVVACWPAKDDGIRMSLRGSMKKFKSCHTSLEICSWTRFQPGFLNRQIITLLS
TLNVSDEIFWTVQASMASKLNLMLVASDVAFEVLTASCAEQGNTAAIMLSAGFKPQTEPH
LQGMLTCIRAAQLWGLRDKARIYVPPGRWLMGCLDELGELKEGQCFIQVSESSLENCFSK
HGSRFAETKKLQVINGFVVIKPNPCLHPGDVRILEAVDRPELHHLCDCLVFPQKGD RPHT
NEASESDLGDGLYFVTW DENLIPPSKSKCPPMEYTPAEAKPLTCHVNHQNLGQICSAHVV
LSEYGAFDENCILLAKLAATAVDSPKTGKIVTMP SHLKPKIYPDFMEKEEYQTYKSNKIL
GRLYRQIKDAYDENISVSSEIDINPVDIHC DTDLEVPEVDF TADARNQKCSYDQQLNGL
LGQYNVNRKEFRHIWSMPKYNSRKQGELQERL KHSYSAFRKEFRQVF EKMN SDFELSDNE
```

KNVLYEQKASAWYQVTYHREWVKKSLDLLEQGSARSVLLSFAWIANDYLARIKIKCQEM  
ANIGKSKPVNNLARLLIGCKPLCHVK

CsAGO5b: Cs7g17970 - Chromosome 7: from 13.774.473 to 13.781.129

>CsAGO5b

MSRRGGGGRRPDSRRDQPTQAPAPSFQRGGGGAARPRGRGRQGQRGGAGRGS HSGSGAAPSSPH  
TASTSTEPAPSSPSVSASASASSSSSVSTLVEETE QKLT LAAPAAATLPPSSSLAVRLPVRPGF  
GTVGRKCVVRANHF MVQLAEKDIHHYDVSITPWVTSKKINRQIIISQLINLYRLTDLGGRI PAYD  
GMKSIYTAGPLPFQSKEFIIELPDS DPRSSSTRPIRERQFRVVIRLASKPDLTYTLQQFLGRRH  
FEAPYDVIQVLGVILSAASSEKHTVVGRSFFPTDHGPIGQLGDGVEYWRGYFQSLRLTQMGLSL  
NIDVSARSFYEPILVTEFVQNYCRNLSRPLSDQVRLKVKKELKGIKVVLTHLETSSNSHRITGIS  
SQPMSQLAFTDGSATSMSVIQYFRERYNIALQFTSLPALLAGSEARPIYLPMELSRIVAGQRYT  
QRLNERQVTALLQATCQRPREREDYIRMMARANAYNEDTLVNKEFGIQVADDLTSVDARILPAP  
MLKYHETGQEASVNPFGFGQWNMINKKMFNGRVEVWTCVNFSTRLN RDVPFQFCQGLVDMCNSK  
GMVFNPPQVPIPISSSNPNQIEKALVDVHNRTTQQGKQLQLLIIILPDVSGSYVPRFLVKIDRFA  
SLVGGRN TVLVDAVQKRIPLVTD RPTIIFGADVTHPQPWGGTSPSIAAVVASMDWPEVAKYRGL  
VSAQAPHEEIIQDLYKSIQDPQWGLVHGGMIRELLIAFRRSTNFKPHRIIFYRDGVGERQFSQV  
LLHEMN AIRQACASLEEGYAPPVTFVVVQKRCRTRLFPAEHNRCDLTDRSGNILPGTVVDTEIC  
HPTEFD FYLNSHAGIQGTSRPTRYHVLYDENRFTADGLQVLTNNLCYTYARCTRSVSI VPPAYY  
AYLA AFRARYYIEDETSAGGSTDGNRSTAERNLAIRPLPVIKDNVKDVMFYC

CsAGO5c: Cs7g17930 - Chromosome 7: from 13.732.122 to 13.738.824

>CsAGO5c

MSRRGGGGRRRDRDSCRDQPTQAPAPSFQRGGGGAAGPRGRGRQGQRGGAGRGS HSGSGAAP  
SSPHTASTSTAPAPSSPSVSESSPSSSSSVSTLVEETE QKLSLAAPAAATLPP LSSQELRL  
PVRPGIGTVGRKCVVRANHF MVQLAERDIHHYDVSIDQVQDLESNRYSEVTSKKINRQII  
SHLINLYGLTNLGGRI PAYDGMKNIYTAGPLPFESKEFIIINLPDS DPHSSSTSPGREGQ  
FRVVIRLASM PDLTYTLQQFLRRMHFEAPYHVIQVLDVVLRAAPSEKHTVLGRSFFSADLG  
PMGQLGDDVEYWRGYFQSLRPTQMGLSLNIDVSASSFYKPILVTEFVQYYCSDL SRPLSD  
QVRLKVKKALKGIKVVL RHMGYNLNCKITGITSQPMSQVMFTDGSVTEMSVVQYFLERHN  
IALQFTSLPALEAGTEERRIYLPMELSRIVEGQRYTKRLNERQVTALLRATCQRPRDREA  
NIQTMARKNAYNKD TLVNKEFGIQVADGLTSFDARILPAPMVIMCHFVLFVTGLWCFQSP  
CALKYHESGREASVNPDFGQWNMINKKMFNGGT VQVWTCMNFSTCLNQDVS RFCQRLVDM  
CKKKG MVVFNPPQVPIPISSYNPNQIEKELVDVHSKTTQPGKQLQLLIIILPDVSRSYGE  
GRIKRV CETELGIVSQCCQPKHASSRNMQYFENVALKINVKVGGRNTVLVDAVQKRIPLV  
TDRPTIIFGADVTHPQPGEDSSPSIAAVVASMDWPEVTKYRGLVSSQAHNEEIIQDLYKS  
IKDPQRGLVHGGMIRELLIDFRRSTNFKPHRIIFYRRDGVSEGQFSQVLLHEMN AIRQAC  
ASIEEGYAPPVTFVVVQKRHHTRLFPAEYNNRDLTDRSGNILPGTVVD TQICHPT EFD FY  
LNSHAGIQQITCVTRNMFTFSLIGFNIALLNLSVCKVYSISFN RMAVPPAYY AHLAAFR  
ARFYIEDETSAGGSTGGTRSTAEAGSLAIRPLPVIKDNVKDVMFYC

CsAGO6-like: Cs6g16080 - Chromosome 6: from 17.010.270 to 17.016.001

>CsAGO6-like

MKFKPDSEAHGSPSEIIPPVNESSQIKSVTGPEVTKKIKPSGSKGEITSLLSNHFKVSIT  
GASGHIFHYSVALFYDDGCP IETKGI RRKI IDKVCETYSADLAEMLKESKRTSKLGPTGE  
KSLFTISALPHKKMEFLVLLDNPSSYRTTSDNDSPDGHGSNNERDRKRRRVSQSKTFKVEI  
SVAAKIPLQAI AAAALHGQESQNSREAFRVLDIILRQHAAKHGCFLVRQSFFQNEPRSF  
LGGGVLGCWGFHSSFQATQGGLSLNITTTI IKPGPIIDFLIANQNV RDCYQLDWAKAKRT  
LKILRIRVHPFNREYRITGLSDSTCKRQMF SWKSGVKDRNDDVKCVDVTVFDYFVNHRI  
NLCFSGDFPCIDVGKPRKPTYIPIELCSLLSLQRYTKALTVFQRSALVEKSQQKPKQEKMK  
IITDVMSRKNKNDSEPM LRSCGISINSRFAQVEGRILSAPRLMAGNREVI FPKNGRWSFHN  
KVIFVPAAKIDHWAVANFSGGCDIRSLCRDLIRFGEMKRISTSPPLNVFEENPQFRRAPA  
PVRVDRMF EQMKQKFEKRPCFLLCLLPDRKDS DLYGSWKRKTLSEFGIFNQCLAPTKVNE  
QYLMNVLLKINAKLGLNSLLAIEQSKNLPLVSKVPTIIFGMDVSHGSPGHSNVPSVAAV  
VSSRNWPILSRYSRVSRSQSTKLEMIDSLFKPLPNKDDAGIVRELLVDFYKSSGQTKPSQ  
IIFRSTLTWRFFFLFIFYAI IAFGTFLFSNIQERCYHLSWIGSKIWKAGSVGLMTSHGK  
PVYSLFLLFPRAVSRNSMTLG IKGDCGIWLLLG YIRLPETAKTFSYHHNSLPETVKT FNYY  
HNSSLNLMSIFAQVSI GLPPYARSDCLWMYQRSTTAVSVVAPVRYAHLAAAQFSQFMKFD  
DLSEISSSPGGQTSSGHAHVPALPKLHENVRSSMFFC
